# Supplementary material for: Exosomal mitochondrial tRNAs and miRNAs as potential predictors of inflammation in renal proximal tubular epithelial cells
Source: PubMed Central journal article supplement (PMC9136061; doi:10.1016/j.omtn.2022.04.035), 2022-05-04
Supplement: mmc1.pdf [file mmc1.pdf]

**Supplemental information**

**Exosomal mitochondrial tRNAs and miRNAs as  
potential predictors of inflammation in renal  
proximal tubular epithelial cells**

**Glory Ranches, Maximilian Zeidler, Roman Kessler, Martina Hoelzl, Michael W. Hess, Jonathan Vosper, Paul Perco, Herbert Schramek, Kai K. Kummer, Michaela Kress, Anne Krogsdam, Michael Rudnicki, Gert Mayer, and Alexander Huettenhofer**

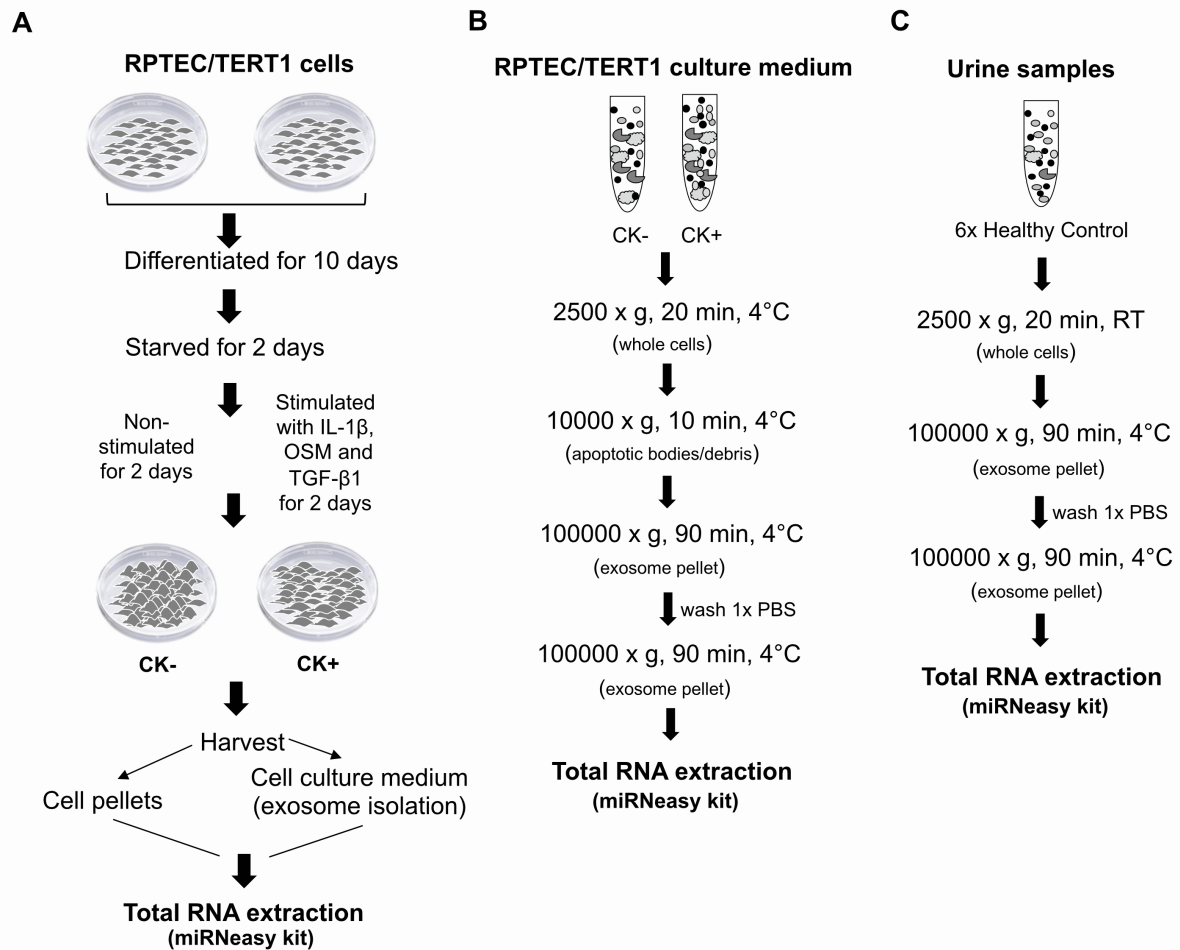

**Figure S1. Schematic representation of RPTEC cytokine stimulation and exosome isolation methods employed in RPTEC culture medium and urine samples. A)** An equal number of RPTECs were grown as describe in ‘Materials and Methods’. CK- indicates non-stimulated cells and CK+ represents cytokine-stimulated cells or diseased-cells. **B)** An equal volume of RPTEC culture medium from each sample (A) were processed for ultracentrifugation as indicated and the resulting exosome pellets were analysed for total RNA extraction. **C)** An equal volume of urine samples from healthy control group (n=6) were processed for ultracentrifugation as indicated and the urinary exosome pellets were analysed similar to (B).

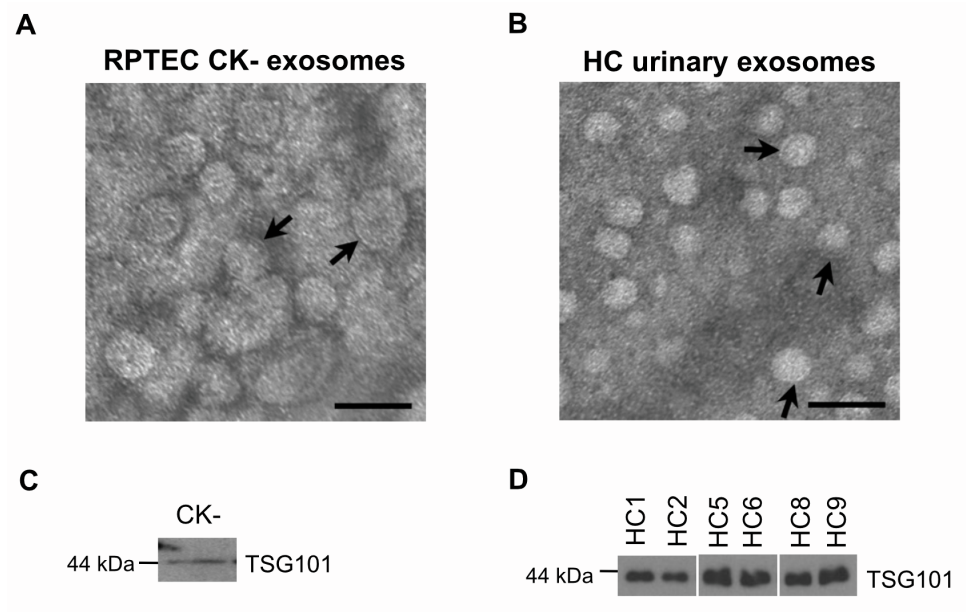

**Figure S2. Characterisation of exosomes derived from non-stimulated RPTECs and healthy control urine samples.** **A)** Transmission electron microscopy (TEM) of exosomes derived from non-stimulated RPTECs (CK-) and **B)** urinary exosomes from healthy control (HC) group; arrows point to the exosome membrane bilayer; scale bar= 50nm. **C)** Immunoblot analysis of TSG101 in exosomal lysates from CK- and **D)** urinary exosome samples obtained from HC group (n=6).

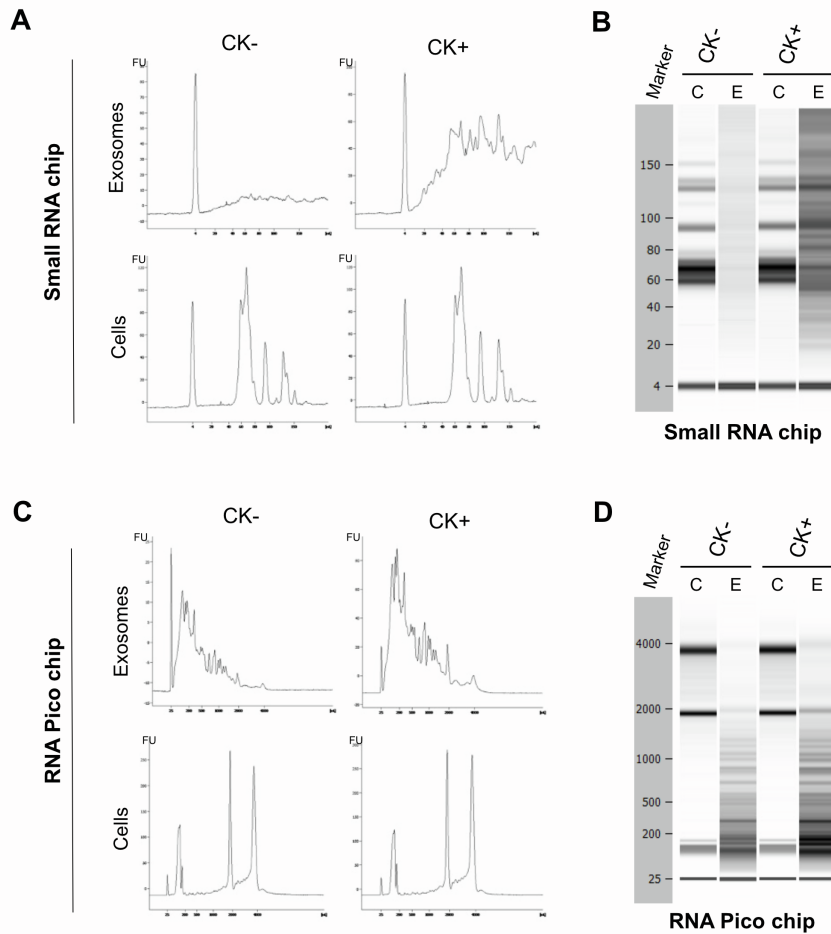

**Figure S3. Bioanalyzer profile of total RNA extract from RPTEC exosomes or cells. A)** Electropherogram profile of total exosomal RNA extracts (upper panels) and total cellular RNA extracts (lower panels) from either non-stimulated (CK-) or cytokine-stimulated cells (CK+) samples using small RNA chip (<200 nt). An equal amount of total cellular RNA (5 ng) and an equal volume of total exosomal RNA extract (1  $\mu$ l) for each sample was used for loading. Total exosomal RNA extracts of CK- were undiluted (1:0) while CK+ was diluted in water (1:6). **B)** PAGE gel profile indicating the distribution and molecular size of total exosomal (E) and cellular (C) RNA populations of (A). **C)** Electropherogram profile of total exosomal RNA extracts (upper panels) and total cellular RNA extracts (lower panels) as in (A) using RNA pico chip. **D)** PAGE gel analysis showing the distribution and molecular size of exosomal (E) and cellular (C) RNA populations in (C).

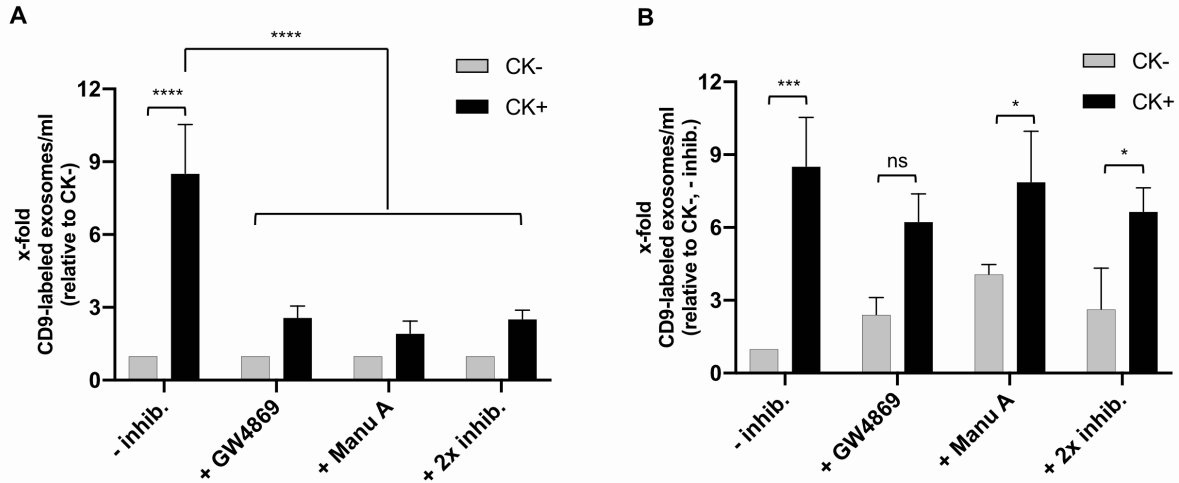

**Figure S4. The effect of GW4869 and/or manumycin A on exosome release in RPTECs. A)** The fold change (x-fold) of exosome release in cytokine-stimulated sample (CK+) relative to non-stimulated (CK-) sample in the absence or presence of a single inhibitor, (i.e. GW4869 or manumycin A (Manu A)) or two inhibitors (2x inhib.) was analysed by fluorescence-based detection of anti-CD9 (Alexa-647 nm)-labeled exosomes using microplate reader (see Materials and Methods). Bar graph represents mean  $\pm$  SD of three independent experiments. Data were analysed using two-way ANOVA, with multiple comparisons and Bonferroni correction (GraphPad Prism, 8.0.1). \*\*\*\* indicates  $p < 0.0001$ . **B)** Analysis of anti-CD9 (Alexa-647 nm)-labeled exosomes derived from CK- or CK+ RPTECs under similar conditions as in (A). The fold change (x-fold) of CD9-positive exosomes for each sample was calculated relative to CK- sample without inhibitor (-inhib.). Data were analysed using two-way ANOVA, with multiple comparisons and Bonferroni correction (GraphPad Prism, 8.0.1). \* indicates  $p < 0.05$ , \*\*\* indicates  $p < 0.001$  and ns represents not significant.

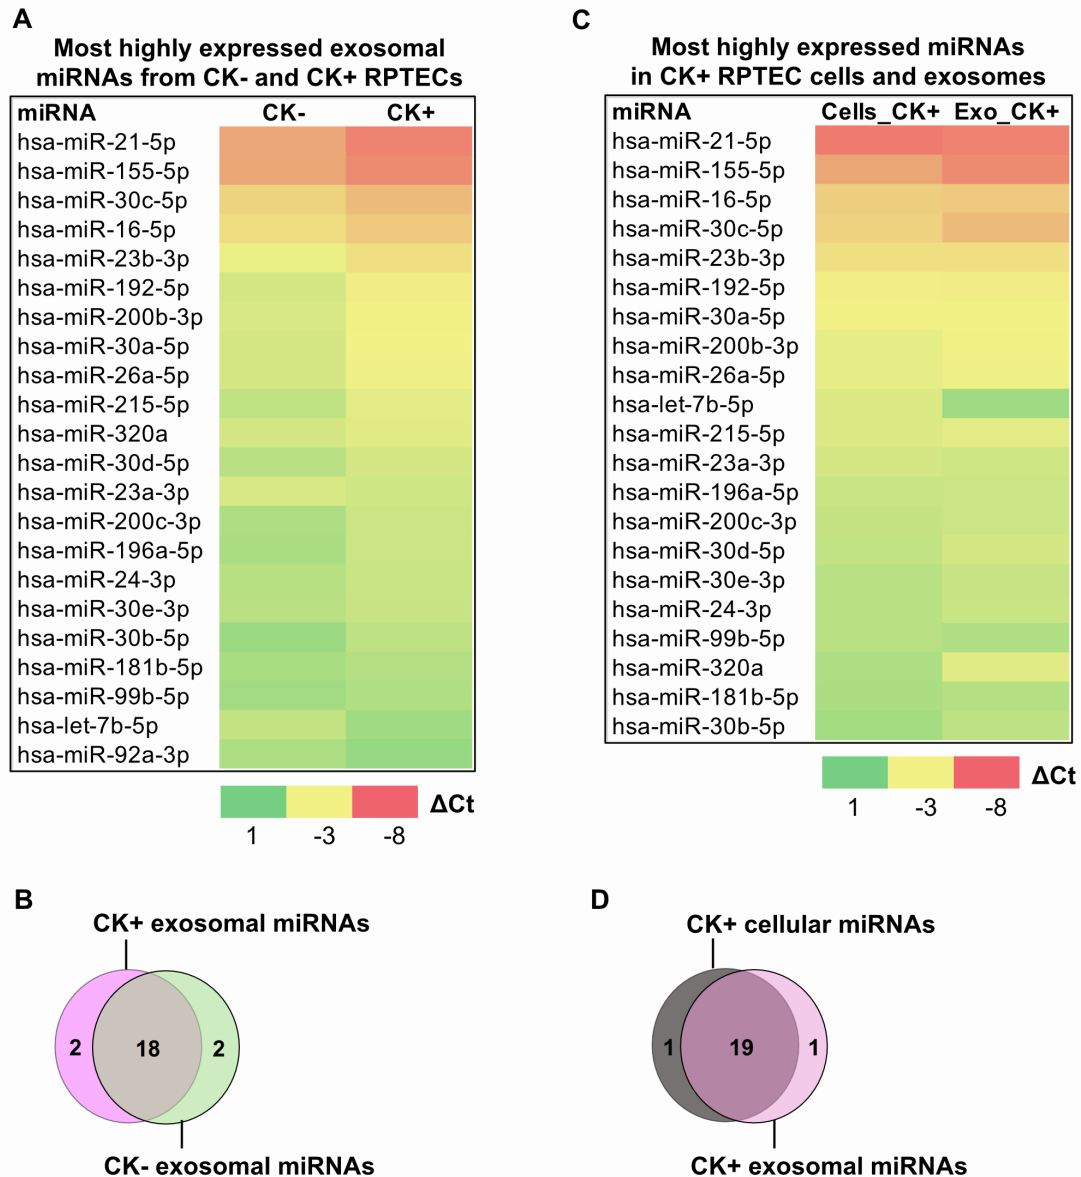

**Figure S5. Most abundant exosomal miRNAs in RPTEC cells and exosomes.** **A)** Heat map of 20 most highly abundant RPTEC exosomal miRNAs derived from non-stimulated (CK-) and cytokine-stimulated (CK+). Heat map colors indicate the normalized  $\Delta Ct$  ( $Ct_{\text{target miRNA}} - Ct_{\text{reference 6x miRNAs}}$ ) values of each target miRNA. Red indicates lower  $\Delta Ct$  (higher expression) and green indicates higher  $\Delta Ct$  (lower expression). **B)** Venn diagram of (A) showing the overlap of most highly abundant exosomal miRNAs between CK- and CK+. **C)** Most highly abundant miRNAs derived from CK+ RPTEC cells and exosomes. Similar analysis was performed as in (A). **D)** Overlap of (C) showing that the majority of most highly abundant miRNAs from CK+ RPTECs are secreted and released via exosomes.

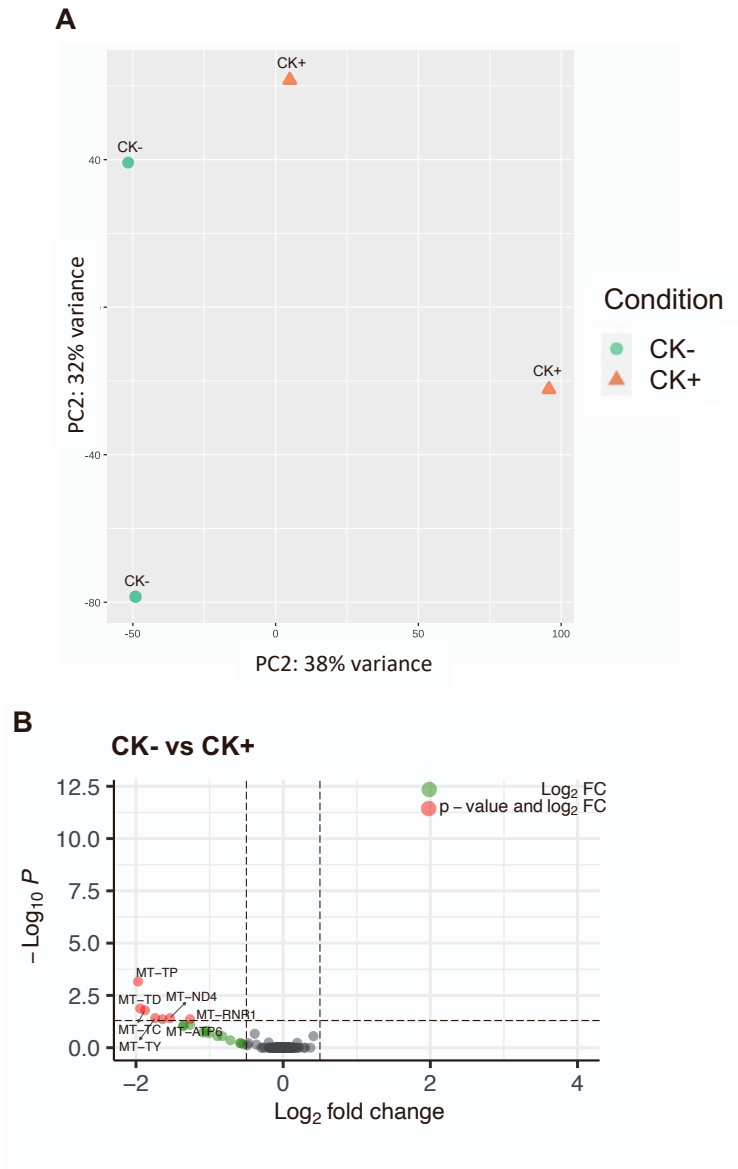

**Figure S6. Analysis of differentially abundant exosomal RNAs. A)** Principal component analysis (PCA) of exosomal RNA expression from cytokine-stimulated (CK+) and non-stimulated (CK-) RPTECs. **B)** Volcano plot analysis of differentially expressed exosomal mt-RNAs (adjusted  $p < 0.05$ ) derived from CK+ (red) and that from CK- RPTECs (green).

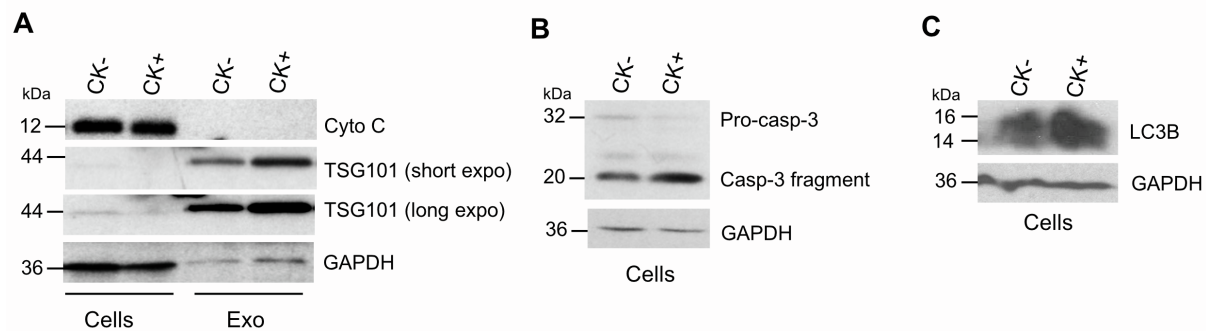

**Figure S7. Immunoblot analysis of TSG10, cytochrome C, caspase-3 and LC3B.**

RPTECs were either non-stimulated (CK-) or cytokine-stimulated (CK+). Total cell lysates (Cells) and exosomal lysates (Exo) under CK- or CK+ condition were analysed by SDS-PAGE and the protein expressions of **A**) exosome marker tumor suppressor gene (TSG101) and mitochondrial protein cytochrome C (Cyto C); **B**) pro-caspase-3 full length (Pro-casp-3) and caspase-3 fragment (Casp-3); and **C**) LC3B were detected by immunoblotting. GAPDH was used as a loading control. Western blot images (A-C) are representative of at least two independent experiments.



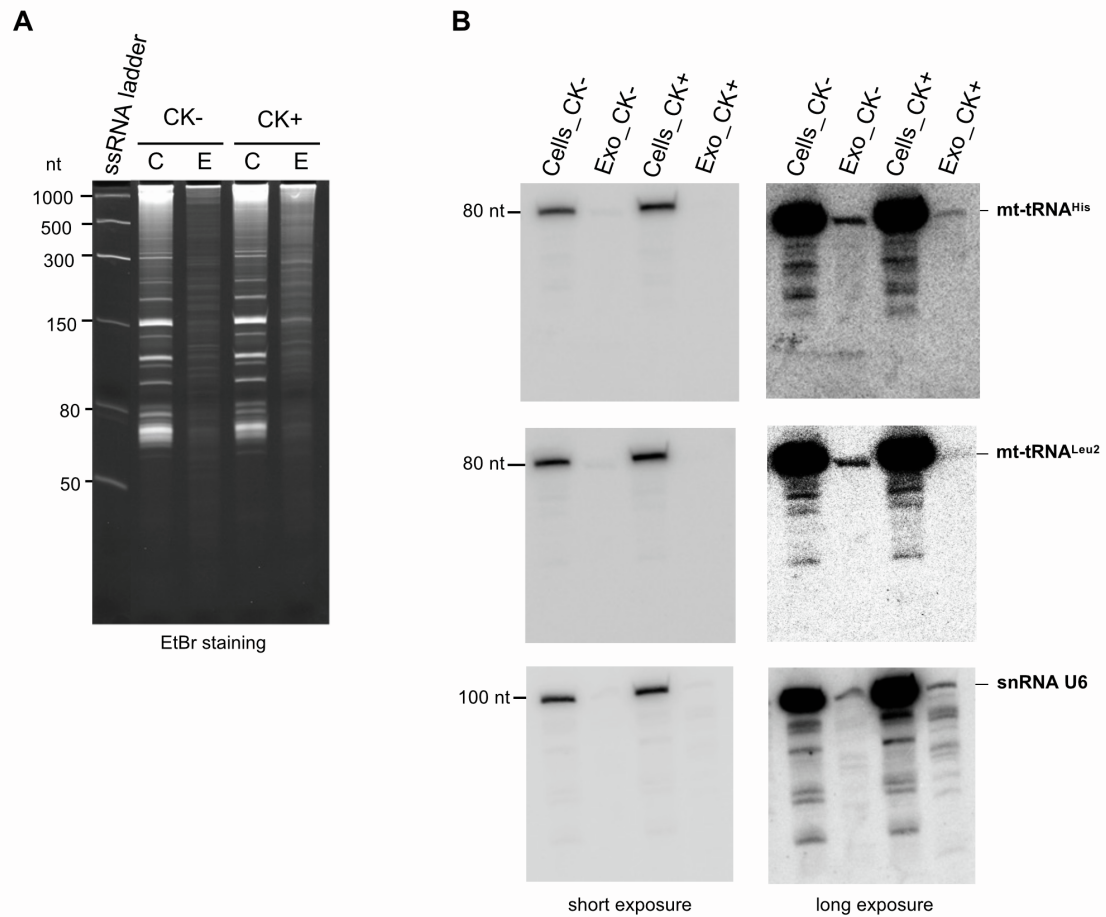

**Figure S8. A)** Ethidium bromide (EtBr) staining of total cellular RNA (C) and total exosomal RNA (E) derived either from non-stimulated (CK-) or cytokine-stimulated (CK+) RPTECs (see Materials and Methods). **B)** Northern blot analysis of mt-tRNA<sup>His</sup>, mt-tRNA<sup>Leu2</sup> and snRNA U6 (uncut membranes).

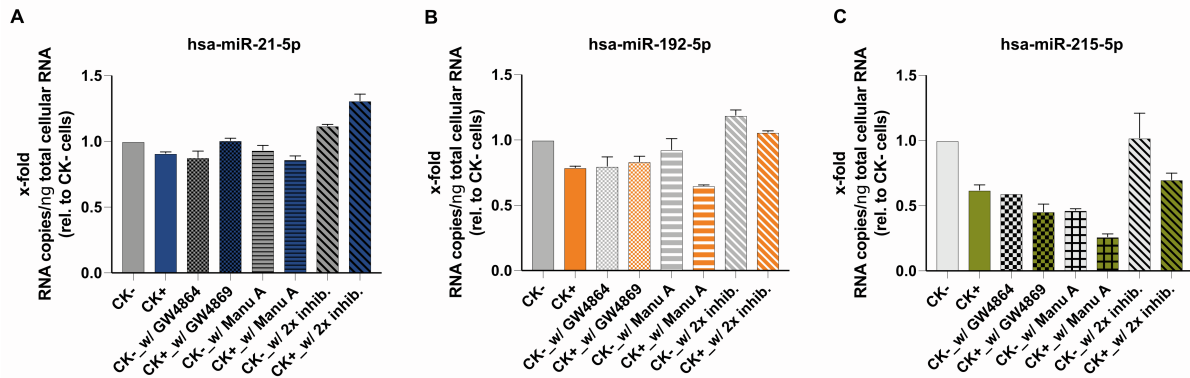

**Figure S9. Comparison of cellular miRNAs, hsa-miR-21-5p, -215-5p and -192-5p expressions in RPTECs under different conditions.** A-C) The expression of three candidate exosomal miRNAs under non-stimulated (CK-) or cytokine-stimulated (CK+), in the presence or absence of GW4869 and/or manumycin A (Manu A) (2x inhib.), was analysed by absolute quantification PCR (see Materials and Methods). The relative abundance (x-fold) of each candidate exosomal miRNA was determined based on the total RNA copy numbers/ng of total cellular RNA in each sample relative to that in CK-sample without inhibitor. Data represent mean  $\pm$  SD of a single analysis (pool of three samples) in three replicates.

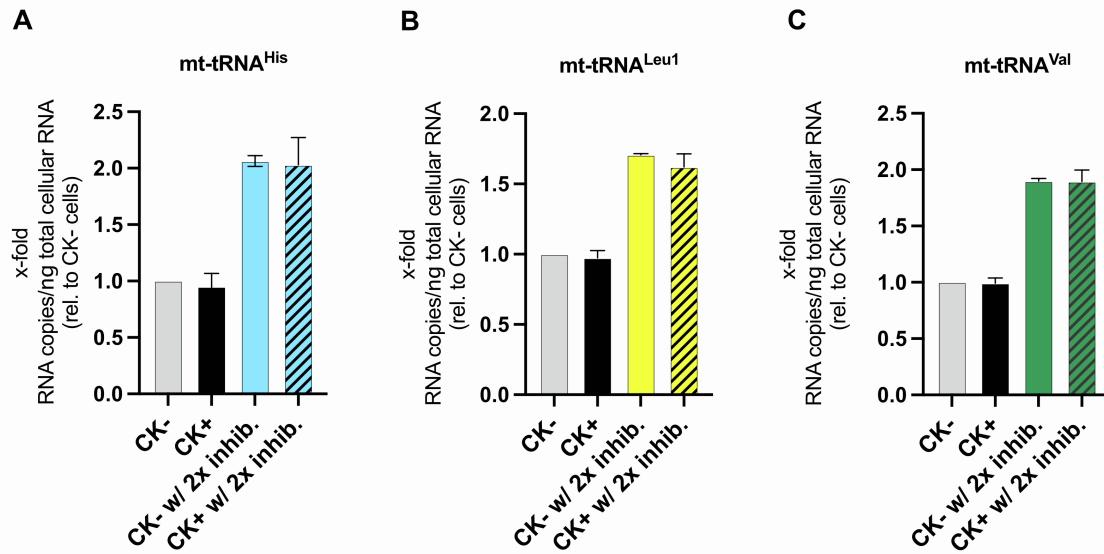

**Figure S10. Comparison of cellular mt-tRNA (mt-tRNA<sup>His</sup>, mt-tRNA<sup>Leu1</sup> and mt-tRNA<sup>Val</sup>) expressions in RPTECs under different conditions.** A-C) The expression of three candidate exosomal mt-tRNAs under non-stimulated (CK-) or cytokine-stimulated (CK+), in the presence or absence of GW4869 and manumycin A (Manu A) (2x inhib.), was analysed by absolute quantification PCR (see Materials and Methods). The relative abundance (x-fold) of each candidate exosomal miRNA was determined based on the total RNA copy numbers/ng of total cellular RNA in each sample relative to that in CK- sample without inhibitor. Data represent mean  $\pm$  SEM of two independent experiments.

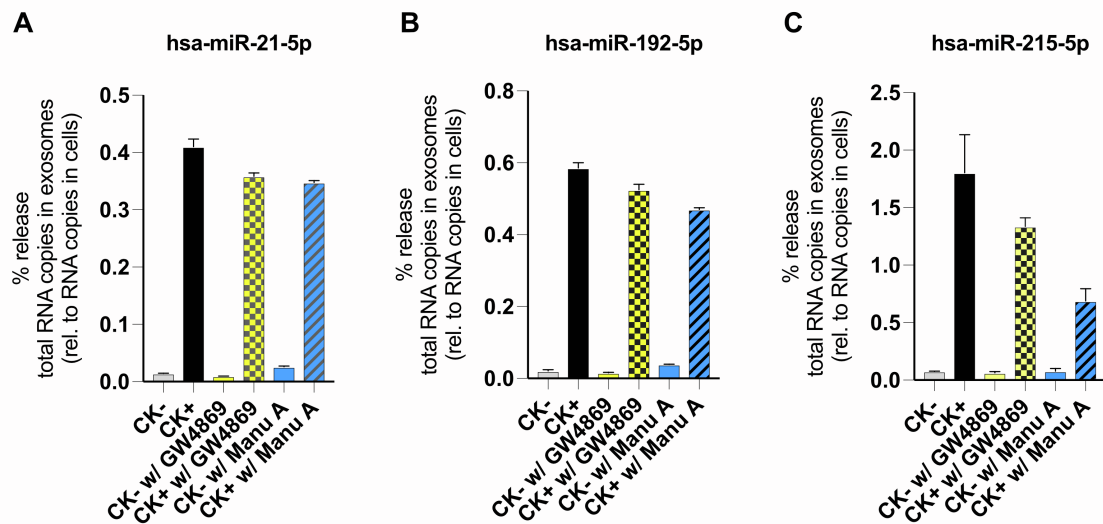

**Figure S11. Effect of GW4869 and manumycin A on the cytokine-induced release of exosomal miRNAs, hsa-miR-21-5p, -215-5p and -192-5p from RPTECs.** A-C-) RT-qPCR analysis of dysregulated exosomal miRNAs, hsa-miR-21-5p, -215-5p and -192-5p, derived from non-stimulated (CK-) or cytokine-stimulated (CK+) RPTECs treated with individual exosome inhibitor, GW4869 (5  $\mu$ M) or manumycin A (Manu A) (250 nM). The RNA copy numbers of exosomal miRNAs were analysed by absolute quantification PCR using a synthetic miRNA (i.e. hsa-miR-21-5p, -215-5p or -192-5p) as a standard curve. The percentage (%) release of each dysregulated exosomal miRNA was calculated from the total cDNA copy number in exosomes over the total cDNA copy number in cells. Data represent mean  $\pm$  SD of a single analysis, which consists of three independent samples pooled together.

**Table S1. List of reference genes for normalization.** Data represent mean and standard deviation (SD) of Ct values.

| miRNA ID        | Exosome samples |      | Cell samples |      | Urine samples |      |
|-----------------|-----------------|------|--------------|------|---------------|------|
|                 | Mean            | SD   | Mean         | SD   | Mean          | SD   |
| hsa-let-7a-5p   | 27.22           | 2.34 | 32.09        | 0.47 | 26.78         | 1.57 |
| hsa-let-7b-5p   | 26.46           | 1.93 | 29.86        | 0.69 | 27.36         | 1.66 |
| hsa-miR-103a-3p | 31.61           | 3.48 | 36.97        | 0.03 | 28.20         | 1.61 |
| hsa-miR-191-5p  | 27.16           | 3.13 | 33.12        | 0.98 | 29.88         | 1.60 |
| hsa-miR-26a-5p  | 24.95           | 3.21 | 29.64        | 0.51 | 27.49         | 1.88 |
| hsa-miR-92a-3p  | 26.94           | 2.15 | 31.59        | 0.46 | 28.63         | 1.42 |

**Table S2. Differentially abundant exosomal miRNAs in cytokine-stimulated (CK+) (n=3) and non-stimulated (CK-) (n=3) RPTECs.**

| miRNA ID        | Fold change (FC=2 <sup>-ΔΔCt</sup> )<br>CK+ / CK- | p-value |
|-----------------|---------------------------------------------------|---------|
| hsa-miR-31-3p   | 4.6                                               | 0.0318  |
| hsa-miR-218-5p  | 3.4                                               | 0.0384  |
| hsa-miR-146a-5p | 3.1                                               | 0.0162  |
| hsa-miR-130a-3p | 3.1                                               | 0.0338  |
| hsa-miR-421     | 2.9                                               | 0.0086  |
| hsa-miR-21-5p   | 2.5                                               | 0.0011  |
| hsa-miR-146b-5p | 2.5                                               | 0.0088  |
| hsa-miR-625-3p  | 2.5                                               | 0.0314  |
| hsa-miR-126-5p  | 2.4                                               | 0.0393  |
| hsa-miR-192-5p  | 2.3                                               | 0.0204  |
| hsa-miR-215-5p  | 2.2                                               | 0.0227  |
| hsa-miR-30b-5p  | 2.2                                               | 0.0327  |
| hsa-miR-196a-5p | 2.1                                               | 0.0405  |
| hsa-miR-155-5p  | 2.1                                               | 0.0085  |
| hsa-miR-30a-5p  | 2.0                                               | 0.0485  |
| hsa-miR-151a-3p | 2.0                                               | 0.0085  |
| hsa-miR-200b-3p | 1.9                                               | 0.0055  |
| hsa-miR-200c-3p | 1.9                                               | 0.0108  |
| hsa-miR-361-5p  | 1.9                                               | 0.0237  |
| hsa-miR-126-3p  | 1.9                                               | 0.0013  |
| hsa-miR-30c-5p  | 1.8                                               | 0.0135  |
| hsa-miR-30d-5p  | 1.8                                               | 0.0374  |
| hsa-miR-182-5p  | 1.7                                               | 0.0149  |
| hsa-miR-23b-3p  | 1.7                                               | 0.0011  |
| hsa-miR-151a-5p | 1.7                                               | 0.0474  |
| hsa-miR-194-5p  | 1.6                                               | 0.0308  |
| hsa-let-7a-5p   | 0.6                                               | 0.0346  |
| hsa-miR-10b-5p  | 0.6                                               | 0.0392  |
| hsa-let-7c-5p   | 0.4                                               | 0.0227  |
| hsa-miR-663a    | 0.2                                               | 0.0071  |

**Table S3. Analysis of most highly expressed exosomal RNAs from non-stimulated (CK-) and cytokine-stimulated (CK+) RPTECs by RNA-sequencing. Highlighted ncRNAs indicate the overlapping ncRNAs between CK- and CK+.**

| CK-               |              |                              | CK+               |              |                              |
|-------------------|--------------|------------------------------|-------------------|--------------|------------------------------|
| Gene ID           | Gene biotype | Average of normalized counts | Gene ID           | Gene biotype | Average of normalized counts |
| <b>MT-RNR2</b>    | Mt rRNA      | 14699                        | <b>AC073140.2</b> | lncRNA       | 14346                        |
| <b>AC073140.2</b> | lncRNA       | 10499                        | <b>MT-RNR2</b>    | Mt rRNA      | 7350                         |
| <b>MT-TM</b>      | Mt tRNA      | 7740                         | <b>RNY1</b>       | misc RNA     | 6458                         |
| <b>MT-RNR1</b>    | Mt rRNA      | 6385                         | <b>SNORD100</b>   | snoRNA       | 4673                         |
| <b>SNORD100</b>   | snoRNA       | 5058                         | <b>MIR30A</b>     | miRNA        | 4306                         |
| <b>RNY1</b>       | misc RNA     | 4637                         | <b>MT-RNR1</b>    | Mt rRNA      | 2160                         |
| MT-TS2            | Mt tRNA      | 3125                         | <b>MIR10B</b>     | miRNA        | 1784                         |
| <b>MIR30A</b>     | miRNA        | 3016                         | <b>MIR31</b>      | miRNA        | 1723                         |
| MT-TL2            | Mt tRNA      | 2030                         | <b>VTRNA1-1</b>   | misc RNA     | 1464                         |
| MT-TH             | Mt tRNA      | 1864                         | <b>GAS5</b>       | lncRNA       | 1412                         |
| <b>VTRNA1-1</b>   | misc RNA     | 1741                         | <b>MT-TM</b>      | Mt tRNA      | 1401                         |
| <b>MIR10B</b>     | miRNA        | 1626                         | MIR200A           | miRNA        | 1210                         |
| MT-TV             | Mt tRNA      | 1317                         | <b>SNORD6</b>     | snoRNA       | 1138                         |
| <b>MIR31</b>      | miRNA        | 1217                         | <b>SNORD69</b>    | snoRNA       | 1074                         |
| <b>SNORD69</b>    | snoRNA       | 1129                         | MIR200B           | miRNA        | 951                          |
| <b>GAS5</b>       | lncRNA       | 1040                         | MIR221            | miRNA        | 926                          |
| <b>SNORD6</b>     | snoRNA       | 1001                         | MIR30D            | miRNA        | 888                          |
| RNY4              | misc RNA     | 960                          | MIRLET7G          | miRNA        | 853                          |
| MIR3591           | miRNA        | 925                          | SNORD99           | snoRNA       | 762                          |
| RNY3              | misc RNA     | 848                          | MIR29A            | miRNA        | 746                          |

**Table S4. Differentially abundant exosomal mtRNAs from cytokine-stimulated relative to non-stimulated RPTECs.**

| <b>Gene ID</b> | <b>Log2 FC</b> | <b>p-value</b> | <b>adjusted p-value</b> |
|----------------|----------------|----------------|-------------------------|
| MT-TV          | -2.82          | 1.657E-11      | 6.349E-08               |
| MT-TI          | -2.57          | 7.755E-07      | 3.301E-04               |
| MT-TS2         | -2.40          | 1.066E-09      | 1.361E-06               |
| MT-TR          | -2.34          | 4.031E-07      | 2.574E-04               |
| MT-TL2         | -2.25          | 3.581E-10      | 6.859E-07               |
| MT-TH          | -2.14          | 1.644E-08      | 1.575E-05               |
| MT-TM          | -2.09          | 2.244E-07      | 1.719E-04               |
| MT-TL1         | -2.09          | 5.379E-07      | 2.944E-04               |
| MT-TF          | -2.02          | 6.438E-07      | 3.083E-04               |
| MT-TP          | -1.97          | 1.804E-06      | 6.912E-04               |
| MT-TD          | -1.94          | 3.839E-05      | 1.337E-02               |
| MT-TC          | -1.88          | 5.093E-05      | 1.626E-02               |
| MT-TY          | -1.74          | 1.329E-04      | 3.831E-02               |
| MT-ATP6        | -1.64          | 1.808E-04      | 4.347E-02               |
| MT-ND4         | -1.54          | 1.400E-04      | 3.831E-02               |
| MT-RNR1        | -1.27          | 1.816E-04      | 4.347E-02               |



**Table S5. Overlap of dysregulated exosomal miRNAs in the CKD group (Next generation Sequence Analysis of clinical samples)<sup>19</sup> and RPTEC CK+ group (diseased cells) (RT-qPCR analysis using LNA miRNA miRNome Human Panel I).**

| CKD stage  | miRNA ID        | Clinical samples (CKD vs. Healthy control) |                  | RPTECs (CK+ vs. CK-) |         |
|------------|-----------------|--------------------------------------------|------------------|----------------------|---------|
|            |                 | Log2 Fold Change                           | p-value adjusted | Fold change          | p-value |
| <b>I</b>   | hsa-miR-215-5p  | 3.7                                        | 0.0122           | 2.2                  | 0.0227  |
| <b>II</b>  | hsa-miR-126-5p  | 3.7                                        | 0.0023           | 2.4                  | 0.0393  |
|            | hsa-miR-126-3p  | 2.2                                        | 0.0458           | 1.9                  | 0.0013  |
|            | hsa-miR-21-5p   | 1.5                                        | 0.0217           | 2.5                  | 0.0011  |
|            | hsa-miR-215-5p  | 1.3                                        | 0.0931           | 2.2                  | 0.0227  |
|            | hsa-miR-192-5p  | 1.2                                        | 0.0531           | 2.3                  | 0.0204  |
|            | hsa-miR-31-3p   | 1.2                                        | 0.0789           | 4.6                  | 0.0318  |
|            | hsa-miR-23b-3p  | 0.6                                        | 0.0789           | 1.7                  | 0.0011  |
| <b>III</b> | hsa-miR-215-5p  | 3.8                                        | 0.0146           | 2.2                  | 0.0227  |
|            | hsa-miR-146a-5p | 2.3                                        | 0.0110           | 3.1                  | 0.0162  |
| <b>IV</b>  | hsa-miR-215-5p  | 3.5                                        | 0.0270           | 2.2                  | 0.0227  |
|            | hsa-miR-192-5p  | 2.7                                        | 0.0349           | 2.3                  | 0.0204  |
|            | hsa-miR-146a-5p | 1.5                                        | 0.0864           | 3.1                  | 0.0162  |
|            | hsa-miR-23b-3p  | 0.6                                        | 0.0991           | 1.7                  | 0.0011  |

**Table S6. Overlap of dysregulated exosomal mt-tRNAs in the CKD group<sup>19</sup> and RPTEC CK+ group (diseased cells).**

| CKD stage  | mt-tRNA ID | Clinical samples (CKD vs. Healthy control) |                  | RPTECs (CK+ vs. CK-) |                  |
|------------|------------|--------------------------------------------|------------------|----------------------|------------------|
|            |            | Log2 Fold Change                           | p-value adjusted | Log2 Fold Change     | p-value adjusted |
| <b>I</b>   | MT-TC      | -3.1                                       | 9.41E-05         | -1.88                | 1.63E-02         |
|            | MT-TI      | -2.9                                       | 3.84E-03         | -2.57                | 3.30E-04         |
|            | MT-TL2     | -2.9                                       | 7.41E-04         | -2.25                | 6.86E-07         |
|            | MT-TS2     | -2.7                                       | 3.84E-03         | -2.40                | 1.36E-06         |
|            | MT-TL1     | -2.6                                       | 6.40E-04         | -2.09                | 2.94E-04         |
|            | MT-TH      | -2.5                                       | 6.14E-04         | -2.14                | 1.57E-05         |
|            | MT-TM      | -2.5                                       | 7.02E-04         | -2.09                | 1.72E-04         |
|            | MT-TV      | -2.5                                       | 1.12E-03         | -2.82                | 6.35E-08         |
|            | MT-TP      | -2.4                                       | 7.33E-03         | -1.97                | 6.91E-04         |
|            | MT-TY      | -2.2                                       | 2.00E-02         | -1.74                | 3.83E-02         |
|            | MT-TR      | -2.0                                       | 2.90E-02         | -2.34                | 2.57E-04         |
|            | MT-TF      | -1.9                                       | 7.42E-03         | -2.02                | 3.08E-04         |
|            | MT-TD      | -1.5                                       | 7.78E-02         | -1.94                | 1.34E-02         |
| <b>II</b>  | MT-TD      | -1.9                                       | 4.96E-02         | -1.94                | 1.34E-02         |
|            | MT-TR      | -1.8                                       | 7.85E-02         | -2.34                | 2.57E-04         |
|            | MT-TC      | -1.7                                       | 2.97E-02         | -1.88                | 1.63E-02         |
|            | MT-TP      | -1.6                                       | 8.98E-02         | -1.97                | 6.91E-04         |
|            | MT-TL2     | -1.4                                       | 9.94E-02         | -2.25                | 6.86E-07         |
|            | MT-TH      | -1.2                                       | 8.46E-02         | -2.14                | 1.57E-05         |
| <b>III</b> | MT-TD      | -3.2                                       | 2.91E-03         | -1.94                | 1.34E-02         |
|            | MT-TL1     | -2.6                                       | 1.85E-03         | -2.09                | 2.94E-04         |
|            | MT-TL2     | -2.4                                       | 6.56E-03         | -2.25                | 6.86E-07         |
|            | MT-TC      | -1.9                                       | 1.30E-02         | -1.88                | 1.63E-02         |
|            | MT-TM      | -1.9                                       | 9.93E-03         | -2.09                | 1.72E-04         |
|            | MT-TP      | -1.8                                       | 5.83E-02         | -1.97                | 6.91E-04         |
|            | MT-TI      | -1.8                                       | 6.88E-02         | -2.57                | 3.30E-04         |
|            | MT-TH      | -1.8                                       | 1.56E-02         | -2.14                | 1.57E-05         |
|            | MT-TF      | -1.4                                       | 6.31E-02         | -2.02                | 3.08E-04         |
|            | MT-TV      | -1.3                                       | 8.98E-02         | -2.82                | 6.35E-08         |
| <b>IV</b>  | MT-TC      | -2.0                                       | 2.04E-03         | -1.88                | 1.63E-02         |
|            | MT-TP      | -1.6                                       | 7.16E-02         | -1.97                | 6.91E-04         |
|            | MT-TL1     | -1.6                                       | 4.15E-03         | -2.09                | 2.94E-04         |
|            | MT-TY      | -1.8                                       | 4.17E-02         | -1.74                | 3.83E-02         |

**Table S7. List of primers and template sequences.**

| #  | Name                                                | Sequences (5' to 3')                                                        | Assay         | Source              |
|----|-----------------------------------------------------|-----------------------------------------------------------------------------|---------------|---------------------|
| 1  | hsa-miR-21-5p                                       | UAGCUUAUCAGACUGAUGUUGA                                                      | PCR           | YP00204230 (Qiagen) |
| 2  | hsa-miR-192-5p                                      | CUGACCUAUGAAUUGACAGCC                                                       | PCR           | YP00204099 (Qiagen) |
| 3  | hsa-miR-215-5p                                      | AUGACCUAUGAAUUGACAGAC                                                       | PCR           | YP00204598 (Qiagen) |
| 4  | hsa-miR-194-5p                                      | UGUAACAGCAACUCCAUUGUGA                                                      | PCR           | YP00204080 (Qiagen) |
| 5  | hsa-miR-126-3p                                      | UCGUACCGUGAGUAAUAAUGCG                                                      | PCR           | YP00204227 (Qiagen) |
| 6  | hsa-miR-146a-5p                                     | UGAGAACUGAAUCCAUUGGGUU                                                      | PCR           | YP00204688 (Qiagen) |
| 7  | hsa-miR-21-5p                                       | TAGCTTATCAGACTGATGTTGA                                                      | PCR           | IDT                 |
| 8  | hsa-miR-192-5p                                      | CTGACCTATGAATTGACAGCC                                                       | PCR           | IDT                 |
| 9  | hsa-miR-215-5p                                      | ATGACCTATGAATTGACAGAC                                                       | PCR           | IDT                 |
| 10 | Universal primer rev                                | GAATCGAGCACCACTTACGCA                                                       | PCR           | IDT                 |
| 11 | hsa-miR-21a-5p template w/ tag                      | GAATCGAGCACCACTTACGCACTTTTGCTCAACATCAGTCTGATAAGCTA                          | PCR           | IDT                 |
| 12 | hsa-miR-192-5p template w/ tag                      | GAATCGAGCACCACTTACGCACTTTTGCGGCTGTCAATTCATAGGTCAG                           | PCR           | IDT                 |
| 13 | hsa-miR-215-5p template w/ tag                      | GAATCGAGCACCACTTACGCACTTTTGCGTGTCAATTCATAGGTCAT                             | PCR           | IDT                 |
| 14 | SNORD100 fwd                                        | TACATGATGACAACCTGGCTCC                                                      | PCR           | IDT                 |
| 15 | mt-tRNA <sup>Leu</sup> fwd                          | GATTGTGAATCTGACAACAGAGG                                                     | PCR           | IDT                 |
| 16 | mt-tRNA <sup>Leu2</sup> fwd                         | CCATTGGTCTTAGGCCCA                                                          | PCR           | IDT                 |
| 17 | mt-tRNA <sup>Val</sup> fwd                          | GCTTAACACAAAGCACCAACT                                                       | PCR           | IDT                 |
| 18 | mt-tRNA <sup>Phe</sup> fwd                          | CCTCTCAAAGCAATACACTGA                                                       | PCR           | IDT                 |
| 19 | mt-tRNA <sup>Leu1</sup> fwd                         | GAGCCCGTAATCGCATAAAAC                                                       | PCR           | IDT                 |
| 20 | mt-tRNA <sup>Leu</sup> fwd_w/ T7 promoter sequence  | AGGTAATACGACTCACTATAGGTTAAATATAGTTTAAAC                                     | PCR           | IDT                 |
| 21 | mt-tRNA <sup>Leu1</sup> fwd_w/ T7 promoter sequence | AGGTAATACGACTCACTATAGGTTAAAGATGGCAGAGCC                                     | PCR           | IDT                 |
| 22 | mt-tRNA <sup>Val</sup> fwd_w/ T7 promoter sequence  | AGGTAATACGACTCACTATAGGCAGAGTGTAGCTTAAAC                                     | PCR           | IDT                 |
| 23 | mt-tRNA <sup>Leu</sup> rev                          | GGTAAATAAGGGGTCGTAAAGC                                                      | PCR           | IDT                 |
| 24 | mt-tRNA <sup>Leu1</sup> rev                         | TGTTAAGAAGAGGAATTGAACC                                                      | PCR           | IDT                 |
| 25 | mt-tRNA <sup>Val</sup> rev                          | TCAGAGCGGTCAAGTTAAG                                                         | PCR           | IDT                 |
| 26 | mt-tRNA <sup>Leu</sup> template                     | GTAATATAGTTTAAACAAAACATCAGATGTGAATCTGACAACAGAGGCTTACGACCCCTTATTACC          | PCR           | IDT                 |
| 27 | mt-tRNA <sup>Leu1</sup> template                    | GTTAAGATGGCAGAGCCCGGTAATCGCATAAAACTTAAACTTTACAGTCAGAGGTTCAATTCCTCTTCTTAAACA | PCR           | IDT                 |
| 28 | mt-tRNA <sup>Val</sup> template                     | CAGAGTGTAGCTTAAACAAAGCACCAACTTACACTTAGGAGATTTCAACTTAACTTACCGCTCTGA          | PCR           | IDT                 |
| 29 | mt-tRNA <sup>Leu</sup> rev                          | CCTCTGTTGTGAGATTCACAATC                                                     | northern blot | IDT                 |
| 30 | mt-tRNA <sup>Leu2</sup> rev                         | TGGGGCCTAAGACCAATGG                                                         | northern blot | IDT                 |
